# Supplementary material for: Salinity Tolerance of Two Potato Cultivars (Solanum tuberosum) Correlates With Differences in Vacuolar Transport Activity
Source: Front Plant Sci. 2018 Jun 5;9:737. doi: 10.3389/fpls.2018.00737 (PMC5996281; doi:10.3389/fpls.2018.00737)
Supplement: Supplementary file 1 [file Data_Sheet_1.xlsx]

## Sheet: Blad1
				VP1	VP2	NHX1	NHX2	NHX3	NHX4
			Desiree 0	0.295644	0.073941	0.00134337	0.0103685	0.00456739	0.0123581
			Desiree 0	0.201853	0.0598405	0.00102477	0.0113528	0.00515106	0.0152083
			Desiree 0	0.17796	0.06404	0.000668174	0.0109195	0.00602567	0.0110107
			Desiree 60	0.235147	0.0859428	0.00106087	0.00835463	0.00907927	0.0171654
			Desiree 60	0.261727	0.10412	0.00132708	0.00858237	0.00994539	0.0200126
			Desiree 60	0.217559	0.0998822	0.00117887	0.00771638	0.0111899	0.0142036
			Mozart 0	0.467744	0.063371	0.0021864	0.0115561	0.00833381	0.0207543
			Mozart 0	0.421525	0.0731508	0.00183956	0.0107654	0.00780325	0.0225802
			Mozart 0	0.395826	0.0626851	0.00157604	0.0108106	0.00746413	0.0197898
			Mozart 60	0.216304	0.103846	0.00173322	0.0182964	0.0124337	0.025837
			Mozart 60	0.181272	0.0890198	0.00122133	0.0144058	0.00899097	0.026704
			Mozart 60	0.242513	0.099323	0.00126033	0.0162705	0.00822762	0.0224374
				Values of expression data used to make Figure 7.
